# Supplementary material for: Block copolymer self-assembly derived mesoporous magnetic materials with three-dimensionally (3D) co-continuous gyroid nanostructure
Source: Royal Society of Chemistry journal article supplement (doi:10.1039/d3sm01622f), 2024-01-01
Supplement: d3sm01622f1.pdf [file d3sm01622f1.pdf]

## Block copolymer self-assembly derived mesoporous magnetic materials with three-dimensionally (3D) co-continuous gyroid nanostructure

Amaury Jousset Drouhin, William R. T. Tait, William Moore, Fei Yu, Yuanzhi Lee, Joerg Werner, R. Bruce van Dover, Ulrich B. Wiesner

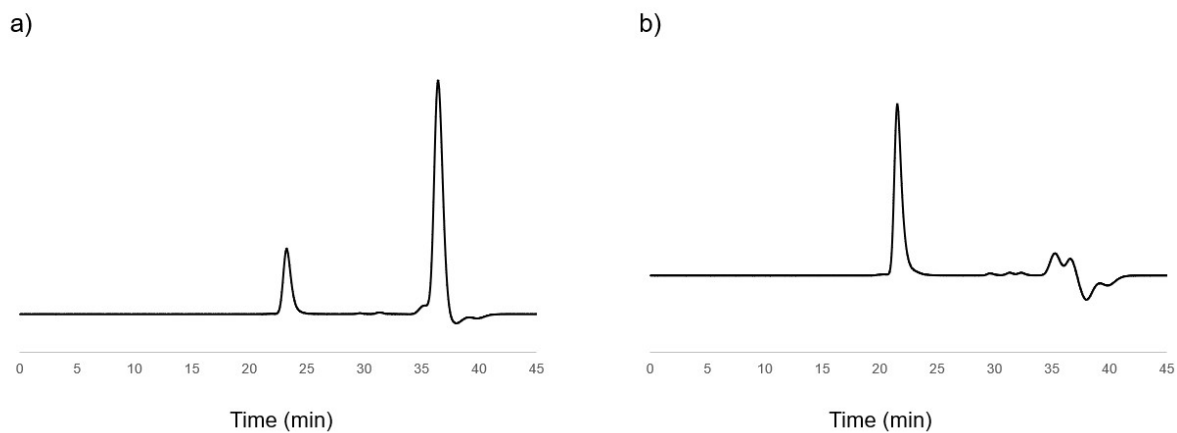

Figure S1: GPC of polyisoprene (PI) aliquot (a) and poly(isoprene-*block*-styrene) aliquot (b).

Table S1:

| Sample           | Mn (g/mol)             | PDI  |
|------------------|------------------------|------|
| PI               | 10690 (by PI standard) | 1.04 |
| PI- <i>b</i> -PS | 35329 (by PS standard) | 1.08 |

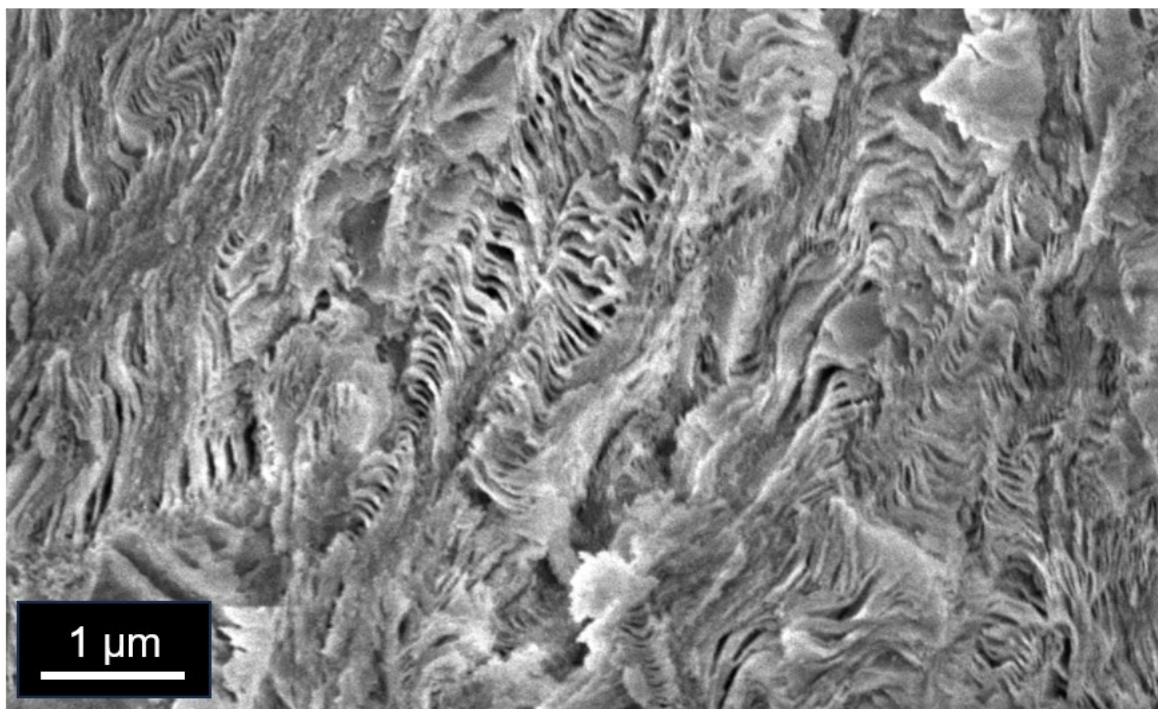

Figure S2: SEM images showing disordered material resulting from an inorganic additive with a molar ratio of 50:50 aluminosilicate precursor to iron(III) ethoxide.

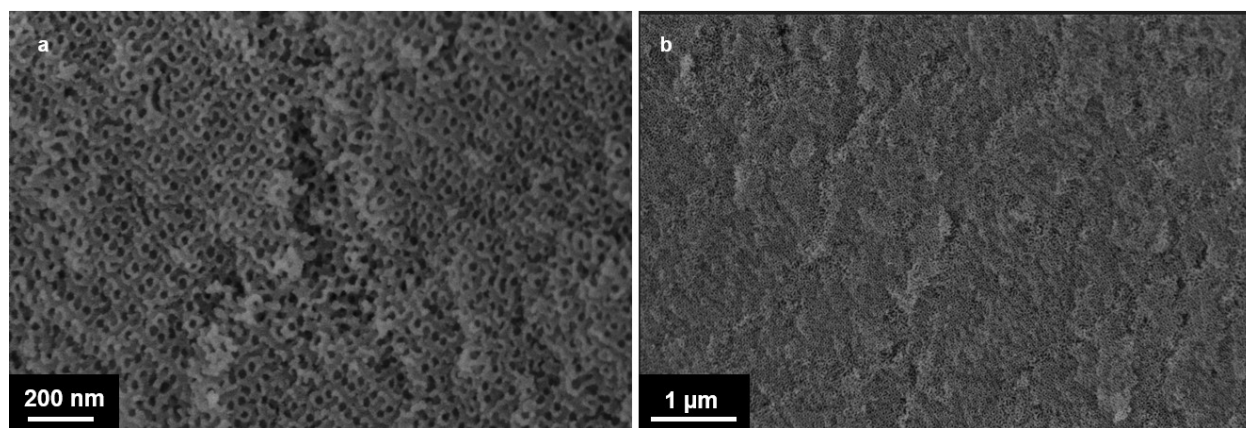

Figure S3: SEM images showing the final mesoporous material at two different magnifications.

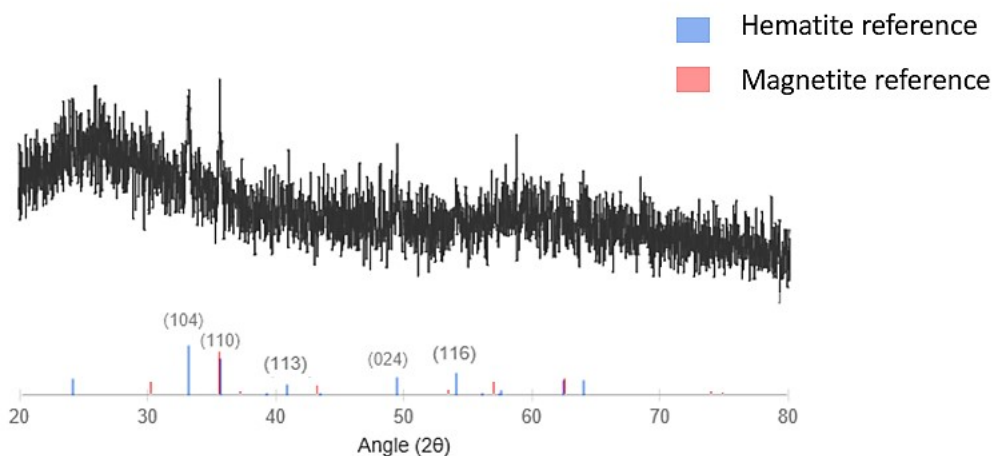

Figure S4: XRD pattern of unstructured sample with reference peaks for hematite ( $\alpha\text{-Fe}_2\text{O}_3$ ) and magnetite ( $\text{Fe}_3\text{O}_4$ ) shown at the bottom from (PDF) #01-087-1164<sup>1</sup> and (PDF) #01-079-0417,<sup>2</sup> respectively.

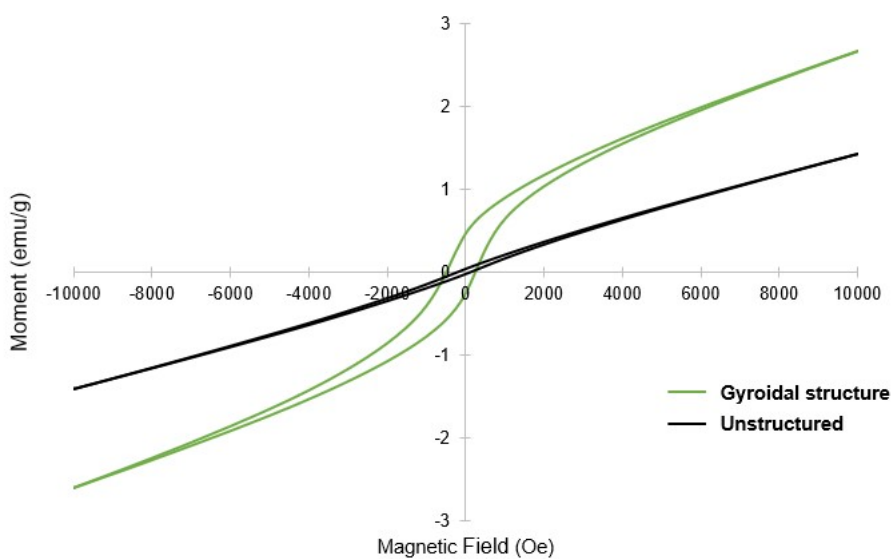

Figure S5: Comparison of M-H curves at 10 K for the BCP-derived mesoporous gyroidal (green) and unstructured bulk aluminosilicate/ $\alpha\text{-Fe}_2\text{O}_3$  inorganic (black) materials.

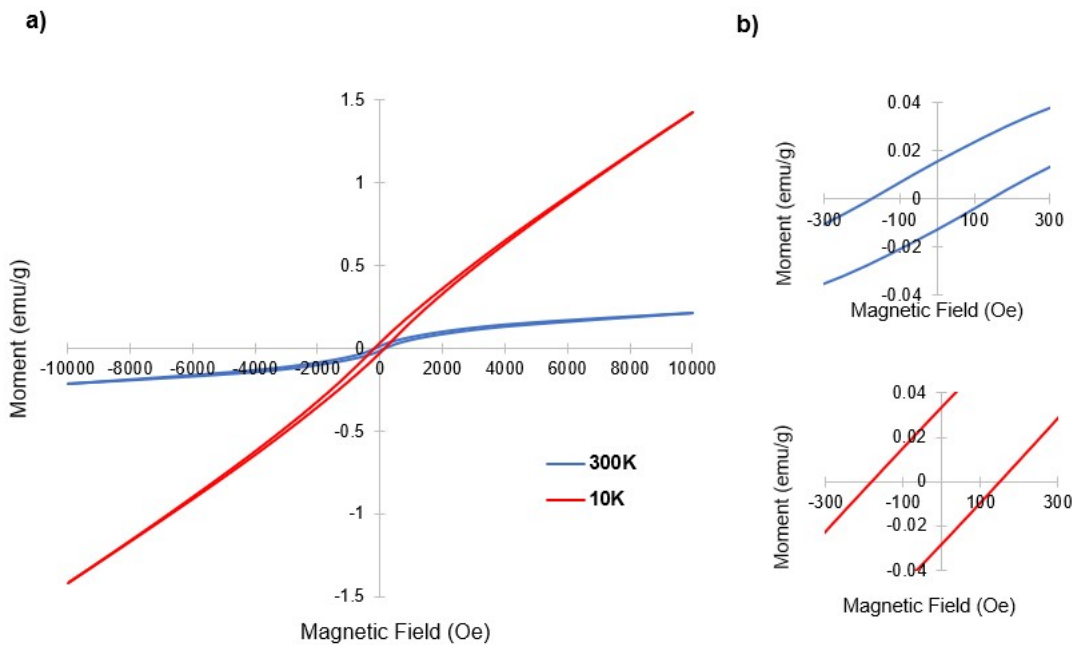

Figure S6: M-H curves at 300 K and 10 K obtained on the unstructured inorganic material (a). Zoomed-in versions showing the hysteresis near  $H=0$  for 300 K (top) and 10 K (bottom) (b).

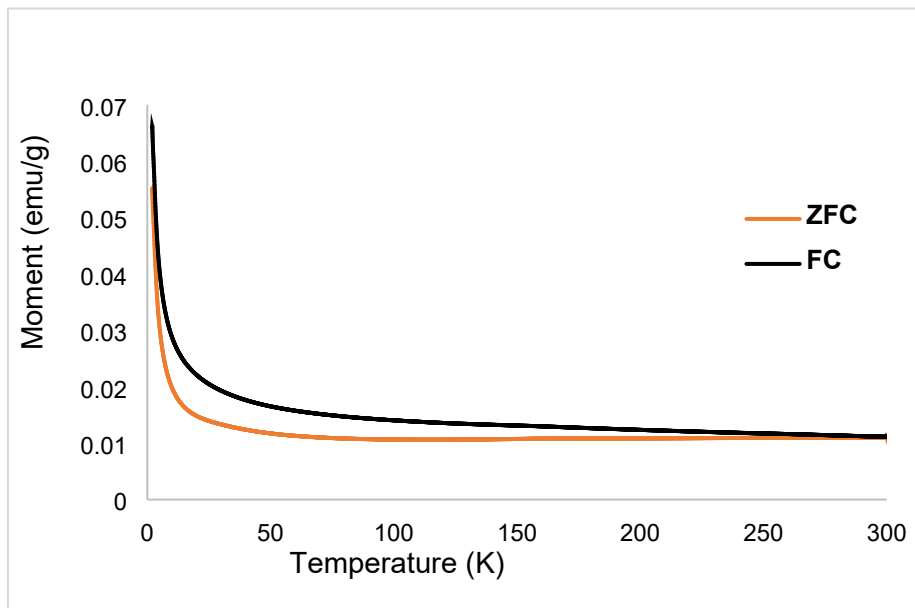

Figure S7: ZFC and FC curves for the unstructured inorganic material with expanded y-axis.

References:

1. Sawada, H. *Mater. Res. Bull.* 1996. 31, 141.
2. Fleet, M. E. *J. Solid State Chem.* 1986. 62, 75.
